# Supplementary material for: Detection of Chlamydiaceae in Swiss wild birds sampled at a bird rehabilitation centre
Source: PubMed Central journal article supplement — Vet Rec Open. 2020 Nov 12;7(1):e000437. doi: 10.1136/vetreco-2020-000437 (PMC7662422; doi:10.1136/vetreco-2020-000437), 2020-11-12
Supplement: vetreco-2020-000437supp001.pdf [file vetreco-2020-000437supp001.pdf]

**Supplementary Table 1.** Details on origin and analysis results of all swab samples collected and processed in the frame of the present study.

(neg. = negative, pos. = positive, n.d. = not determined, N/A = not applicable)

| Sample | Species             | Canton of origin | Material | <i>Chlamydiaceae</i> qPCR (Ø CT value) | <i>C. psittaci</i> qPCR (Ø CT value) | Final classification |
|--------|---------------------|------------------|----------|----------------------------------------|--------------------------------------|----------------------|
| 5Kot   | Blackbird           | LU               | Faeces   | neg.                                   | n.d.                                 | N/A                  |
| 6C     | Hawfinch            | UR               | Choana   | neg.                                   | n.d.                                 | N/A                  |
| 6K     | Hawfinch            | UR               | Cloaca   | neg.                                   | n.d.                                 | N/A                  |
| 7Kot   | Song thrush         | LU               | Faeces   | neg.                                   | n.d.                                 | N/A                  |
| 9C     | Blackbird           | BE               | Choana   | neg.                                   | n.d.                                 | N/A                  |
| 9K     | Blackbird           | BE               | Cloaca   | neg.                                   | n.d.                                 | N/A                  |
| 9Kot   | Blackbird           | BE               | Faeces   | neg.                                   | n.d.                                 | N/A                  |
| 10Kot  | Blackbird           | NW               | Faeces   | neg.                                   | n.d.                                 | N/A                  |
| 20C    | European greenfinch | LU               | Choana   | neg.                                   | n.d.                                 | N/A                  |
| 20K    | European greenfinch | LU               | Cloaca   | neg.                                   | n.d.                                 | N/A                  |
| 21C    | Blackbird           | LU               | Choana   | neg.                                   | n.d.                                 | N/A                  |
| 21K    | Blackbird           | LU               | Cloaca   | neg.                                   | n.d.                                 | N/A                  |
| 22Kot  | Blackbird           | LU               | Faeces   | neg.                                   | n.d.                                 | N/A                  |
| 23Kot  | European greenfinch | LU               | Faeces   | neg.                                   | n.d.                                 | N/A                  |
| 24C    | European greenfinch | OW               | Choana   | neg.                                   | n.d.                                 | N/A                  |
| 24K    | European greenfinch | OW               | Cloaca   | neg.                                   | n.d.                                 | N/A                  |
| 24Kot  | European greenfinch | OW               | Faeces   | neg.                                   | n.d.                                 | N/A                  |
| 25Kot  | Common merganser    | LU               | Faeces   | neg.                                   | n.d.                                 | N/A                  |
| 26Kot  | Common merganser    | LU               | Faeces   | neg.                                   | n.d.                                 | N/A                  |
| 27Kot  | Common merganser    | LU               | Faeces   | neg.                                   | n.d.                                 | N/A                  |
| 28Kot  | Common merganser    | LU               | Faeces   | neg.                                   | n.d.                                 | N/A                  |
| 29Kot  | Blackbird           | LU               | Faeces   | neg.                                   | n.d.                                 | N/A                  |
| 30Kot  | Blackbird           | LU               | Faeces   | neg.                                   | n.d.                                 | N/A                  |
| 31Kot  | Blackbird           | LU               | Faeces   | neg.                                   | n.d.                                 | N/A                  |
| 32Kot  | Feral pigeon        | LU               | Faeces   | neg.                                   | n.d.                                 | N/A                  |
| 33Kot  | Blackbird           | LU               | Faeces   | neg.                                   | n.d.                                 | N/A                  |
| 34C    | European greenfinch | LU               | Choana   | neg.                                   | n.d.                                 | N/A                  |
| 34K    | European greenfinch | LU               | Cloaca   | neg.                                   | n.d.                                 | N/A                  |
| 37Kot  | House sparrow       | LU               | Faeces   | neg.                                   | n.d.                                 | N/A                  |
| 38Kot  | House sparrow       | LU               | Faeces   | neg.                                   | n.d.                                 | N/A                  |
| 39Kot  | House sparrow       | OW               | Faeces   | neg.                                   | n.d.                                 | N/A                  |
| 40C    | Great tit           | LU               | Choana   | neg.                                   | n.d.                                 | N/A                  |
| 40K    | Great tit           | LU               | Cloaca   | neg.                                   | n.d.                                 | N/A                  |
| 41Kot  | Great tit           | LU               | Faeces   | neg.                                   | n.d.                                 | N/A                  |
| 42Kot  | Blackbird           | LU               | Faeces   | neg.                                   | n.d.                                 | N/A                  |
| 43Kot  | Great tit           | LU               | Faeces   | neg.                                   | n.d.                                 | N/A                  |
| 44Kot  | Great tit           | LU               | Faeces   | neg.                                   | n.d.                                 | N/A                  |
| 45Kot  | Great tit           | LU               | Faeces   | neg.                                   | n.d.                                 | N/A                  |
| 46Kot  | Great tit           | LU               | Faeces   | neg.                                   | n.d.                                 | N/A                  |
| 47Kot  | Great tit           | LU               | Faeces   | neg.                                   | n.d.                                 | N/A                  |

|       |                       |    |        |      |      |     |
|-------|-----------------------|----|--------|------|------|-----|
| 48Kot | Great tit             | LU | Faeces | neg. | n.d. | N/A |
| 49Kot | Blackbird             | LU | Faeces | neg. | n.d. | N/A |
| 50Kot | Great tit             | LU | Faeces | neg. | n.d. | N/A |
| 51C   | Common swift          | LU | Choana | neg. | n.d. | N/A |
| 51K   | Common swift          | LU | Cloaca | neg. | n.d. | N/A |
| 51Kot | Common swift          | LU | Faeces | neg. | n.d. | N/A |
| 52Kot | Common starling       | LU | Faeces | neg. | n.d. | N/A |
| 53C   | House sparrow         | LU | Choana | neg. | n.d. | N/A |
| 53K   | House sparrow         | LU | Cloaca | neg. | n.d. | N/A |
| 54Kot | House sparrow         | LU | Faeces | neg. | n.d. | N/A |
| 56C   | House sparrow         | LU | Choana | neg. | n.d. | N/A |
| 56K   | House sparrow         | LU | Cloaca | neg. | n.d. | N/A |
| 56Kot | House sparrow         | LU | Faeces | neg. | n.d. | N/A |
| 57Kot | Great tit             | LU | Faeces | neg. | n.d. | N/A |
| 59Kot | Great tit             | LU | Faeces | neg. | n.d. | N/A |
| 61Kot | Eurasian blue tit     | LU | Faeces | neg. | n.d. | N/A |
| 62Kot | Blackbird             | AG | Faeces | neg. | n.d. | N/A |
| 63Kot | House sparrow         | LU | Faeces | neg. | n.d. | N/A |
| 64Kot | Blackbird             | LU | Faeces | neg. | n.d. | N/A |
| 65C   | Common starling       | LU | Choana | neg. | n.d. | N/A |
| 65K   | Common starling       | LU | Cloaca | neg. | n.d. | N/A |
| 66Kot | House sparrow         | LU | Faeces | neg. | n.d. | N/A |
| 67Kot | Common starling       | AG | Faeces | neg. | n.d. | N/A |
| 69Kot | Eurasian blue tit     | LU | Faeces | neg. | n.d. | N/A |
| 70Kot | Mallard               | LU | Faeces | neg. | n.d. | N/A |
| 71Kot | Mallard               | LU | Faeces | neg. | n.d. | N/A |
| 72Kot | Mallard               | LU | Faeces | neg. | n.d. | N/A |
| 73Kot | Mallard               | LU | Faeces | neg. | n.d. | N/A |
| 74Kot | Mallard               | LU | Faeces | neg. | n.d. | N/A |
| 75Kot | Eurasian blue tit     | ZG | Faeces | neg. | n.d. | N/A |
| 76Kot | Eurasian tree sparrow | LU | Faeces | neg. | n.d. | N/A |
| 77C   | Blackbird             | LU | Choana | neg. | n.d. | N/A |
| 77K   | Blackbird             | LU | Cloaca | neg. | n.d. | N/A |
| 78Kot | Blackbird             | LU | Faeces | neg. | n.d. | N/A |
| 79Kot | Eurasian blue tit     | LU | Faeces | neg. | n.d. | N/A |
| 80Kot | Mallard               | LU | Faeces | neg. | n.d. | N/A |
| 81C   | Mallard               | LU | Choana | neg. | n.d. | N/A |
| 81K   | Mallard               | LU | Cloaca | neg. | n.d. | N/A |
| 82Kot | Black redstart        | LU | Faeces | neg. | n.d. | N/A |
| 83Kot | Black redstart        | LU | Faeces | neg. | n.d. | N/A |
| 84Kot | House sparrow         | ZG | Faeces | neg. | n.d. | N/A |
| 85Kot | House sparrow         | ZG | Faeces | neg. | n.d. | N/A |
| 86Kot | European greenfinch   | AG | Faeces | neg. | n.d. | N/A |

|        |                       |    |        |      |      |     |
|--------|-----------------------|----|--------|------|------|-----|
| 87Kot  | Eurasian blue tit     | LU | Faeces | neg. | n.d. | N/A |
| 88Kot  | Eurasian blue tit     | LU | Faeces | neg. | n.d. | N/A |
| 89Kot  | Eurasian blue tit     | LU | Faeces | neg. | n.d. | N/A |
| 90C    | Eurasian blue tit     | LU | Choana | neg. | n.d. | N/A |
| 90K    | Eurasian blue tit     | LU | Cloaca | neg. | n.d. | N/A |
| 91C    | Eurasian blue tit     | LU | Choana | neg. | n.d. | N/A |
| 91K    | Eurasian blue tit     | LU | Cloaca | neg. | n.d. | N/A |
| 92C    | Eurasian blue tit     | LU | Choana | neg. | n.d. | N/A |
| 92K    | Eurasian blue tit     | LU | Cloaca | neg. | n.d. | N/A |
| 93C    | Eurasian blue tit     | LU | Choana | neg. | n.d. | N/A |
| 93K    | Eurasian blue tit     | LU | Cloaca | neg. | n.d. | N/A |
| 94C    | Eurasian blue tit     | LU | Choana | neg. | n.d. | N/A |
| 94K    | Eurasian blue tit     | LU | Cloaca | neg. | n.d. | N/A |
| 95C    | Eurasian blue tit     | LU | Choana | neg. | n.d. | N/A |
| 95K    | Eurasian blue tit     | LU | Cloaca | neg. | n.d. | N/A |
| 96C    | Eurasian tree sparrow | AG | Choana | neg. | n.d. | N/A |
| 96K    | Eurasian tree sparrow | AG | Cloaca | neg. | n.d. | N/A |
| 97Kot  | Eurasian blue tit     | LU | Faeces | neg. | n.d. | N/A |
| 98Kot  | Eurasian blue tit     | LU | Faeces | neg. | n.d. | N/A |
| 99Kot  | Eurasian blue tit     | LU | Faeces | neg. | n.d. | N/A |
| 100C   | White stork           | LU | Choana | neg. | n.d. | N/A |
| 100K   | White stork           | LU | Cloaca | neg. | n.d. | N/A |
| 101Kot | House sparrow         | LU | Faeces | neg. | n.d. | N/A |
| 104Kot | Blackbird             | AG | Faeces | neg. | n.d. | N/A |
| 107Kot | Blackbird             | LU | Faeces | neg. | n.d. | N/A |
| 108Kot | Eurasian blue tit     | NW | Cloaca | neg. | n.d. | N/A |
| 109Kot | Common merganser      | LU | Faeces | neg. | n.d. | N/A |
| 110Kot | Common merganser      | LU | Faeces | neg. | n.d. | N/A |
| 111Kot | Common merganser      | LU | Faeces | neg. | n.d. | N/A |
| 112Kot | Common merganser      | LU | Faeces | neg. | n.d. | N/A |
| 113Kot | Common merganser      | LU | Faeces | neg. | n.d. | N/A |
| 114Kot | Blackbird             | LU | Faeces | neg. | n.d. | N/A |
| 115Kot | Great tit             | LU | Faeces | neg. | n.d. | N/A |
| 116Kot | Great tit             | LU | Faeces | neg. | n.d. | N/A |
| 117Kot | Eurasian blue tit     | LU | Faeces | neg. | n.d. | N/A |
| 118C   | Eurasian blue tit     | LU | Choana | neg. | n.d. | N/A |
| 118Kot | Eurasian blue tit     | LU | Faeces | neg. | n.d. | N/A |
| 119Kot | Blackbird             | LU | Faeces | neg. | n.d. | N/A |
| 120C   | Mallard               | LU | Choana | neg. | n.d. | N/A |
| 120K   | Mallard               | LU | Cloaca | neg. | n.d. | N/A |
| 121C   | Common swift          | LU | Choana | neg. | n.d. | N/A |
| 121K   | Common swift          | LU | Cloaca | neg. | n.d. | N/A |

|        |                        |    |        |      |      |     |
|--------|------------------------|----|--------|------|------|-----|
| 122C   | House sparrow          | LU | Choana | neg. | n.d. | N/A |
| 122K   | House sparrow          | LU | Cloaca | neg. | n.d. | N/A |
| 123Kot | House sparrow          | LU | Faeces | neg. | n.d. | N/A |
| 124Kot | Spotted flycatcher     | LU | Faeces | neg. | n.d. | N/A |
| 127Kot | Blackbird              | LU | Faeces | neg. | n.d. | N/A |
| 128Kot | Blackbird              | LU | Faeces | neg. | n.d. | N/A |
| 129Kot | White wagtail          | LU | Faeces | neg. | n.d. | N/A |
| 130Kot | Blackbird              | LU | Faeces | neg. | n.d. | N/A |
| 131Kot | Common starling        | AG | Faeces | neg. | n.d. | N/A |
| 133Kot | Great tit              | LU | Faeces | neg. | n.d. | N/A |
| 134Kot | Blackbird              | LU | Faeces | neg. | n.d. | N/A |
| 135Kot | Mallard                | ZH | Faeces | neg. | n.d. | N/A |
| 136Kot | Mallard                | ZH | Faeces | neg. | n.d. | N/A |
| 137Kot | Mallard                | ZH | Faeces | neg. | n.d. | N/A |
| 138Kot | Mallard                | ZH | Faeces | neg. | n.d. | N/A |
| 139Kot | Mallard                | LU | Faeces | neg. | n.d. | N/A |
| 140Kot | Mallard                | ZH | Faeces | neg. | n.d. | N/A |
| 141Kot | Mallard                | ZH | Faeces | neg. | n.d. | N/A |
| 142Kot | Great tit              | LU | Faeces | neg. | n.d. | N/A |
| 143Kot | Mallard                | LU | Faeces | neg. | n.d. | N/A |
| 144Kot | Mallard                | LU | Faeces | neg. | n.d. | N/A |
| 145Kot | Mallard                | LU | Faeces | neg. | n.d. | N/A |
| 146Kot | Mallard                | LU | Faeces | neg. | n.d. | N/A |
| 147Kot | Mallard                | LU | Faeces | neg. | n.d. | N/A |
| 148Kot | Mallard                | LU | Faeces | neg. | n.d. | N/A |
| 149Kot | Mallard                | LU | Faeces | neg. | n.d. | N/A |
| 150Kot | Mallard                | LU | Faeces | neg. | n.d. | N/A |
| 151Kot | Mallard                | LU | Faeces | neg. | n.d. | N/A |
| 152Kot | Mallard                | LU | Faeces | neg. | n.d. | N/A |
| 153Kot | House sparrow          | LU | Faeces | neg. | n.d. | N/A |
| 154Kot | Eurasian collared dove | LU | Faeces | neg. | n.d. | N/A |
| 155Kot | Blackbird              | LU | Faeces | neg. | n.d. | N/A |
| 156C   | Blackbird              | LU | Choana | neg. | n.d. | N/A |
| 156K   | Blackbird              | LU | Cloaca | neg. | n.d. | N/A |
| 157Kot | Goldfinch              | LU | Faeces | neg. | n.d. | N/A |
| 158C   | Common swift           | AG | Choana | neg. | n.d. | N/A |
| 158K   | Common swift           | AG | Cloaca | neg. | n.d. | N/A |
| 159Kot | Blackbird              | LU | Faeces | neg. | n.d. | N/A |
| 161Kot | Blackbird              | AG | Faeces | neg. | n.d. | N/A |
| 162Kot | House sparrow          | UR | Faeces | neg. | n.d. | N/A |
| 164Kot | Black redstart         | LU | Faeces | neg. | n.d. | N/A |
| 165C   | Mute swan              | SZ | Choana | neg. | n.d. | N/A |
| 165K   | Mute swan              | SZ | Cloaca | neg. | n.d. | N/A |

|        |                           |    |        |      |      |     |
|--------|---------------------------|----|--------|------|------|-----|
| 168Kot | House sparrow             | LU | Faeces | neg. | n.d. | N/A |
| 169C   | House sparrow             | LU | Choana | neg. | n.d. | N/A |
| 169K   | House sparrow             | LU | Cloaca | neg. | n.d. | N/A |
| 170Kot | House sparrow             | LU | Faeces | neg. | n.d. | N/A |
| 171Kot | European green woodpecker | AG | Faeces | neg. | n.d. | N/A |
| 172Kot | Blackbird                 | LU | Faeces | neg. | n.d. | N/A |
| 173Kot | Blackbird                 | LU | Faeces | neg. | n.d. | N/A |
| 174Kot | Blackbird                 | LU | Faeces | neg. | n.d. | N/A |
| 175Kot | Mallard                   | LU | Faeces | neg. | n.d. | N/A |
| 177Kot | Common starling           | LU | Faeces | neg. | n.d. | N/A |
| 180Kot | Blackbird                 | LU | Faeces | neg. | n.d. | N/A |
| 181Kot | Blackbird                 | LU | Faeces | neg. | n.d. | N/A |
| 182Kot | House sparrow             | LU | Faeces | neg. | n.d. | N/A |
| 183Kot | Eurasian blue tit         | AG | Faeces | neg. | n.d. | N/A |
| 184Kot | Great spotted woodpecker  | LU | Faeces | neg. | n.d. | N/A |
| 185Kot | Eurasian blackcap         | NW | Faeces | neg. | n.d. | N/A |
| 186Kot | Eurasian blackcap         | NW | Faeces | neg. | n.d. | N/A |
| 187Kot | Black redstart            | LU | Faeces | neg. | n.d. | N/A |
| 188C   | Black redstart            | OW | Choana | neg. | n.d. | N/A |
| 188K   | Black redstart            | OW | Cloaca | neg. | n.d. | N/A |
| 189Kot | Eurasian blackcap         | LU | Faeces | neg. | n.d. | N/A |
| 190Kot | Eurasian blackcap         | LU | Faeces | neg. | n.d. | N/A |
| 191C   | Fieldfare                 | LU | Choana | neg. | n.d. | N/A |
| 191K   | Fieldfare                 | LU | Cloaca | neg. | n.d. | N/A |
| 192Kot | House sparrow             | LU | Faeces | neg. | n.d. | N/A |
| 193Kot | Eurasian blue tit         | LU | Faeces | neg. | n.d. | N/A |
| 194Kot | Eurasian blue tit         | LU | Faeces | neg. | n.d. | N/A |
| 195Kot | Eurasian blue tit         | LU | Faeces | neg. | n.d. | N/A |
| 196Kot | Eurasian blue tit         | LU | Faeces | neg. | n.d. | N/A |
| 197Kot | Eurasian blue tit         | LU | Faeces | neg. | n.d. | N/A |
| 198Kot | Common chaffinch          | LU | Faeces | neg. | n.d. | N/A |
| 200Kot | Blackbird                 | LU | Faeces | neg. | n.d. | N/A |
| 201C   | Blackbird                 | LU | Choana | neg. | n.d. | N/A |
| 201K   | Blackbird                 | LU | Cloaca | neg. | n.d. | N/A |
| 202C   | Common swift              | AG | Choana | neg. | n.d. | N/A |
| 202K   | Common swift              | AG | Cloaca | neg. | n.d. | N/A |
| 202Kot | Common swift              | AG | Faeces | neg. | n.d. | N/A |
| 203C   | Common swift              | LU | Choana | neg. | n.d. | N/A |
| 203K   | Common swift              | LU | Cloaca | neg. | n.d. | N/A |
| 204Kot | Blackbird                 | LU | Faeces | neg. | n.d. | N/A |
| 205Kot | House sparrow             | LU | Faeces | neg. | n.d. | N/A |
| 206Kot | House sparrow             | LU | Faeces | neg. | n.d. | N/A |

|        |                          |    |        |      |      |     |
|--------|--------------------------|----|--------|------|------|-----|
| 207Kot | Feral pigeon             | LU | Faeces | neg. | n.d. | N/A |
| 208Kot | House sparrow            | LU | Faeces | neg. | n.d. | N/A |
| 210Kot | Blackbird                | LU | Faeces | neg. | n.d. | N/A |
| 211Kot | Common swift             | LU | Faeces | neg. | n.d. | N/A |
| 212Kot | House sparrow            | LU | Faeces | neg. | n.d. | N/A |
| 216Kot | House sparrow            | LU | Faeces | neg. | n.d. | N/A |
| 217Kot | Eurasian coot            | LU | Faeces | neg. | n.d. | N/A |
| 219C   | Blackbird                | LU | Choana | neg. | n.d. | N/A |
| 219K   | Blackbird                | LU | Cloaca | neg. | n.d. | N/A |
| 220Kot | Eurasian coot            | LU | Faeces | neg. | n.d. | N/A |
| 221C   | House sparrow            | NW | Choana | neg. | n.d. | N/A |
| 221K   | House sparrow            | NW | Cloaca | neg. | n.d. | N/A |
| 222Kot | Blackbird                | LU | Faeces | neg. | n.d. | N/A |
| 224Kot | House sparrow            | LU | Faeces | neg. | n.d. | N/A |
| 225Kot | House sparrow            | AG | Faeces | neg. | n.d. | N/A |
| 226Kot | Black redstart           | LU | Faeces | neg. | n.d. | N/A |
| 227C   | Blackbird                | ZH | Choana | neg. | n.d. | N/A |
| 227K   | Blackbird                | ZH | Cloaca | neg. | n.d. | N/A |
| 229Kot | Blackbird                | LU | Faeces | neg. | n.d. | N/A |
| 230Kot | Blackbird                | ZG | Faeces | neg. | n.d. | N/A |
| 232Kot | Fieldfare                | LU | Faeces | neg. | n.d. | N/A |
| 233C   | Eurasian blackcap        | AG | Choana | neg. | n.d. | N/A |
| 233K   | Eurasian blackcap        | AG | Cloaca | neg. | n.d. | N/A |
| 233Kot | Eurasian blackcap        | AG | Faeces | neg. | n.d. | N/A |
| 234Kot | House sparrow            | AG | Faeces | neg. | n.d. | N/A |
| 235C   | Feral pigeon             | LU | Choana | neg. | n.d. | N/A |
| 235K   | Feral pigeon             | LU | Cloaca | neg. | n.d. | N/A |
| 236C   | Blackbird                | LU | Choana | neg. | n.d. | N/A |
| 236K   | Blackbird                | LU | Cloaca | neg. | n.d. | N/A |
| 238C   | White stork              | LU | Choana | neg. | n.d. | N/A |
| 238K   | White stork              | LU | Cloaca | neg. | n.d. | N/A |
| 239C   | Common chaffinch         | LU | Choana | neg. | n.d. | N/A |
| 239K   | Common chaffinch         | LU | Cloaca | neg. | n.d. | N/A |
| 239Kot | Common chaffinch         | LU | Faeces | neg. | n.d. | N/A |
| 240Kot | Fancy pigeon             | LU | Faeces | neg. | n.d. | N/A |
| 242C   | Common swift             | LU | Choana | neg. | n.d. | N/A |
| 242K   | Common swift             | LU | Cloaca | neg. | n.d. | N/A |
| 243C   | Blackbird                | LU | Choana | neg. | n.d. | N/A |
| 243K   | Blackbird                | LU | Cloaca | neg. | n.d. | N/A |
| 244C   | Mallard                  | LU | Choana | neg. | n.d. | N/A |
| 244K   | Mallard                  | LU | Cloaca | neg. | n.d. | N/A |
| 245Kot | Blackbird                | LU | Faeces | neg. | n.d. | N/A |
| 247Kot | Great spotted woodpecker | LU | Faeces | neg. | n.d. | N/A |

|        |                          |    |        |             |             |                      |
|--------|--------------------------|----|--------|-------------|-------------|----------------------|
| 249Kot | House sparrow            | AG | Faeces | neg.        | n.d.        | N/A                  |
| 250Kot | House sparrow            | AG | Faeces | neg.        | n.d.        | N/A                  |
| 251C   | Goldfinch                | LU | Choana | neg.        | n.d.        | N/A                  |
| 251K   | Goldfinch                | LU | Cloaca | neg.        | n.d.        | N/A                  |
| 251Kot | Goldfinch                | LU | Faeces | neg.        | n.d.        | N/A                  |
| 252Kot | Common swift             | LU | Faeces | neg.        | n.d.        | N/A                  |
| 253Kot | Eurasian tree sparrow    | AG | Faeces | neg.        | n.d.        | N/A                  |
| 254Kot | Black redstart           | LU | Faeces | neg.        | n.d.        | N/A                  |
| 290Kot | Eurasian blackcap        | SO | Faeces | neg.        | n.d.        | N/A                  |
| 291Kot | Spotted flycatcher       | SO | Faeces | neg.        | n.d.        | N/A                  |
| 292Kot | Eurasian blackcap        | SO | Faeces | neg.        | n.d.        | N/A                  |
| 322C   | Great tit                | LU | Choana | neg.        | n.d.        | N/A                  |
| 322K   | Great tit                | LU | Cloaca | neg.        | n.d.        | N/A                  |
| 324C   | Great spotted woodpecker | AG | Choana | neg.        | n.d.        | N/A                  |
| 324K   | Great spotted woodpecker | AG | Cloaca | neg.        | n.d.        | N/A                  |
| 324Kot | Great spotted woodpecker | AG | Faeces | neg.        | n.d.        | N/A                  |
| 325C   | Eurasian nuthatch        | BE | Choana | neg.        | n.d.        | N/A                  |
| 325K   | Eurasian nuthatch        | BE | Cloaca | neg.        | n.d.        | N/A                  |
| 326C   | Blackbird                |    | Choana | neg.        | n.d.        | N/A                  |
| 326K   | Blackbird                |    | Cloaca | neg.        | n.d.        | N/A                  |
| 326Kot | Blackbird                |    | Faeces | neg.        | n.d.        | N/A                  |
| 327C   | Blackbird                | BE | Choana | neg.        | n.d.        | N/A                  |
| 327K   | Blackbird                | BE | Cloaca | neg.        | n.d.        | N/A                  |
| 328Kot | Barn swallow             | BE | Faeces | neg.        | n.d.        | N/A                  |
| 331Kot | Common chaffinch         | LU | Faeces | neg.        | n.d.        | N/A                  |
| 332C   | House sparrow            | LU | Choana | neg.        | n.d.        | N/A                  |
| 332K   | House sparrow            | LU | Cloaca | neg.        | n.d.        | N/A                  |
| 333Kot | Common swift             | LU | Faeces | neg.        | n.d.        | N/A                  |
| 334Kot | House sparrow            | AG | Faeces | neg.        | n.d.        | N/A                  |
| 335Kot | House sparrow            | AG | Faeces | neg.        | n.d.        | N/A                  |
| 336Kot | Blackbird                | OW | Faeces | neg.        | n.d.        | N/A                  |
| 337Kot | House sparrow            | LU | Faeces | neg.        | n.d.        | N/A                  |
| 338Kot | Common swift             | LU | Faeces | neg.        | n.d.        | N/A                  |
| 340Kot | Blackbird                | LU | Faeces | neg.        | n.d.        | N/A                  |
| 341Kot | Blackbird                | LU | Faeces | neg.        | n.d.        | N/A                  |
| 342Kot | Blackbird                | LU | Faeces | neg.        | n.d.        | N/A                  |
| 343Kot | Yellow-legged gull       | LU | Faeces | neg.        | n.d.        | N/A                  |
| 344C   | Fancy pigeon             | LU | Choana | pos. (28.0) | pos. (27.6) | <i>C. psittaci</i> E |
| 344K   | Fancy pigeon             | LU | Cloaca | pos. (29.3) | pos. (29.1) | <i>C. psittaci</i>   |
| 345C   | Great tit                | LU | Choana | neg.        | n.d.        | N/A                  |
| 345K   | Great tit                | LU | Cloaca | neg.        | n.d.        | N/A                  |

|        |                           |    |        |      |      |     |
|--------|---------------------------|----|--------|------|------|-----|
| 346Kot | Common swift              | LU | Faeces | neg. | n.d. | N/A |
| 347Kot | Goldfinch                 | LU | Faeces | neg. | n.d. | N/A |
| 349Kot | Common swift              | LU | Faeces | neg. | n.d. | N/A |
| 350Kot | Blackbird                 | LU | Faeces | neg. | n.d. | N/A |
| 351Kot | Common swift              | LU | Faeces | neg. | n.d. | N/A |
| 352Kot | Common swift              | UR | Faeces | neg. | n.d. | N/A |
| 353C   | Common swift              | LU | Choana | neg. | n.d. | N/A |
| 353K   | Common swift              | LU | Cloaca | neg. | n.d. | N/A |
| 354Kot | Blackbird                 | ZG | Faeces | neg. | n.d. | N/A |
| 355Kot | Blackbird                 | LU | Faeces | neg. | n.d. | N/A |
| 356Kot | White stork               | LU | Faeces | neg. | n.d. | N/A |
| 357Kot | Goldfinch                 | LU | Faeces | neg. | n.d. | N/A |
| 358Kot | White wagtail             | LU | Faeces | neg. | n.d. | N/A |
| 359Kot | Fieldfare                 | LU | Faeces | neg. | n.d. | N/A |
| 360C   | Eurasian coot             | SZ | Choana | neg. | n.d. | N/A |
| 360K   | Eurasian coot             | SZ | Cloaca | neg. | n.d. | N/A |
| 361Kot | Mallard                   | LU | Faeces | neg. | n.d. | N/A |
| 362Kot | Common swift              | LU | Faeces | neg. | n.d. | N/A |
| 363Kot | Spotted flycatcher        | LU | Faeces | neg. | n.d. | N/A |
| 364Kot | White stork               | LU | Faeces | neg. | n.d. | N/A |
| 365Kot | Common wood pigeon        | LU | Faeces | neg. | n.d. | N/A |
| 366Kot | Common wood pigeon        | LU | Faeces | neg. | n.d. | N/A |
| 367Kot | European serin            | LU | Faeces | neg. | n.d. | N/A |
| 368Kot | European green woodpecker | AG | Faeces | neg. | n.d. | N/A |
| 369Kot | House sparrow             | AG | Faeces | neg. | n.d. | N/A |
| 370Kot | Yellow-legged gull        | LU | Faeces | neg. | n.d. | N/A |
| 372Kot | Fancy pigeon              | OW | Faeces | neg. | n.d. | N/A |
| 374C   | Mallard                   | LU | Choana | neg. | n.d. | N/A |
| 374K   | Mallard                   | LU | Cloaca | neg. | n.d. | N/A |
| 374Kot | Mallard                   | LU | Faeces | neg. | n.d. | N/A |
| 375Kot | Alpine swift              | AG | Faeces | neg. | n.d. | N/A |
| 376Kot | Common swift              | LU | Faeces | neg. | n.d. | N/A |
| 380Kot | Fancy pigeon              | AG | Faeces | neg. | n.d. | N/A |
| 384Kot | Yellow-legged gull        | LU | Faeces | neg. | n.d. | N/A |
| 386Kot | Common house martin       | LU | Faeces | neg. | n.d. | N/A |
| 387Kot | Common house martin       | LU | Faeces | neg. | n.d. | N/A |
| 389Kot | Common wood pigeon        | LU | Faeces | neg. | n.d. | N/A |
| 390Kot | Eurasian tree sparrow     | LU | Faeces | neg. | n.d. | N/A |



|        |                       |    |        |      |      |     |
|--------|-----------------------|----|--------|------|------|-----|
| 391Kot | Eurasian tree sparrow | LU | Faeces | neg. | n.d. | N/A |
| 392Kot | Eurasian tree sparrow | LU | Faeces | neg. | n.d. | N/A |
| 393C   | Blackbird             | LU | Choana | neg. | n.d. | N/A |
| 393K   | Blackbird             | LU | Cloaca | neg. | n.d. | N/A |
| 394C   | House sparrow         | LU | Choana | neg. | n.d. | N/A |
| 394K   | House sparrow         | LU | Cloaca | neg. | n.d. | N/A |
| 394Kot | House sparrow         | LU | Faeces | neg. | n.d. | N/A |
| 395Kot | Blackbird             | LU | Faeces | neg. | n.d. | N/A |
| 396Kot | House sparrow         | LU | Faeces | neg. | n.d. | N/A |
| 397Kot | House sparrow         | LU | Faeces | neg. | n.d. | N/A |
| 398Kot | White wagtail         | LU | Faeces | neg. | n.d. | N/A |
| 399Kot | Goldfinch             | LU | Faeces | neg. | n.d. | N/A |
| 400Kot | Common swift          | AG | Faeces | neg. | n.d. | N/A |
| 401Kot | Common chaffinch      | LU | Faeces | neg. | n.d. | N/A |
| 403C   | Blackbird             | LU | Choana | neg. | n.d. | N/A |
| 403K   | Blackbird             | LU | Cloaca | neg. | n.d. | N/A |
| 403Kot | Blackbird             | LU | Faeces | neg. | n.d. | N/A |
| 404Kot | Great tit             | UR | Faeces | neg. | n.d. | N/A |
| 405Kot | Alpine swift          | LU | Faeces | neg. | n.d. | N/A |
| 406Kot | European greenfinch   | AG | Faeces | neg. | n.d. | N/A |
| 407Kot | Hawfinch              | LU | Faeces | neg. | n.d. | N/A |
| 408Kot | Mistle thrush         | AG | Faeces | neg. | n.d. | N/A |
| 409C   | Song thrush           | LU | Choana | neg. | n.d. | N/A |
| 409K   | Song thrush           | LU | Cloaca | neg. | n.d. | N/A |
| 410C   | Grey heron            | SO | Choana | neg. | n.d. | N/A |
| 410K   | Grey heron            | SO | Cloaca | neg. | n.d. | N/A |
| 411Kot | House sparrow         | LU | Faeces | neg. | n.d. | N/A |
| 413Kot | Alpine swift          | LU | Faeces | neg. | n.d. | N/A |
| 414C   | Blackbird             | LU | Choana | neg. | n.d. | N/A |
| 414K   | Blackbird             | LU | Cloaca | neg. | n.d. | N/A |
| 415C   | Blackbird             | LU | Choana | neg. | n.d. | N/A |
| 415K   | Blackbird             | LU | Cloaca | neg. | n.d. | N/A |
| 416C   | Blackbird             | LU | Choana | neg. | n.d. | N/A |
| 416K   | Blackbird             | LU | Cloaca | neg. | n.d. | N/A |
| 417C   | Blackbird             | LU | Choana | neg. | n.d. | N/A |
| 417K   | Blackbird             | LU | Cloaca | neg. | n.d. | N/A |
| 418Kot | White stork           | LU | Faeces | neg. | n.d. | N/A |
| 419Kot | Goldfinch             | LU | Faeces | neg. | n.d. | N/A |
| 420C   | Common wood pigeon    | LU | Choana | neg. | n.d. | N/A |
| 420K   | Common wood pigeon    | LU | Cloaca | neg. | n.d. | N/A |

|        |                           |    |        |             |             |                      |
|--------|---------------------------|----|--------|-------------|-------------|----------------------|
| 421C   | Eurasian reed warbler     | LU | Choana | neg.        | n.d.        | N/A                  |
| 421K   | Eurasian reed warbler     | LU | Cloaca | neg.        | n.d.        | N/A                  |
| 422C   | Blackbird                 | LU | Choana | neg.        | n.d.        | N/A                  |
| 422K   | Blackbird                 | LU | Cloaca | neg.        | n.d.        | N/A                  |
| 423Kot | House sparrow             | LU | Faeces | neg.        | n.d.        | N/A                  |
| 424Kot | Common swift              | LU | Faeces | neg.        | n.d.        | N/A                  |
| 426Kot | Goldfinch                 | LU | Faeces | neg.        | n.d.        | N/A                  |
| 427C   | House sparrow             | LU | Choana | neg.        | n.d.        | N/A                  |
| 427K   | House sparrow             | LU | Cloaca | neg.        | n.d.        | N/A                  |
| 428K   | European green woodpecker | AG | Cloaca | neg.        | n.d.        | N/A                  |
| 429C   | European greenfinch       | LU | Choana | neg.        | n.d.        | N/A                  |
| 429K   | European greenfinch       | LU | Cloaca | neg.        | n.d.        | N/A                  |
| 430C   | Blackbird                 | AG | Choana | neg.        | n.d.        | N/A                  |
| 431C   | Eurasian collared dove    | LU | Choana | pos. (36.0) | pos. (33.3) | <i>C. psittaci</i>   |
| 431K   | Eurasian collared dove    | LU | Cloaca | pos. (16.9) | pos. (15.2) | <i>C. psittaci</i> B |
| 432C   | House sparrow             | ZG | Choana | neg.        | n.d.        | N/A                  |
| 432K   | House sparrow             | ZG | Cloaca | neg.        | n.d.        | N/A                  |
| 433C   | Barn swallow              | LU | Choana | neg.        | n.d.        | N/A                  |
| 433K   | Barn swallow              | LU | Cloaca | neg.        | n.d.        | N/A                  |
| 434Kot | Blackbird                 | LU | Faeces | neg.        | n.d.        | N/A                  |
| 435C   | Blackbird                 | LU | Choana | neg.        | n.d.        | N/A                  |
| 435K   | Blackbird                 | LU | Cloaca | neg.        | n.d.        | N/A                  |
| 435Kot | Blackbird                 | LU | Faeces | neg.        | n.d.        | N/A                  |
| 436Kot | House sparrow             | LU | Faeces | neg.        | n.d.        | N/A                  |
| 437C   | Grey heron                | LU | Choana | neg.        | n.d.        | N/A                  |
| 437K   | Grey heron                | LU | Cloaca | neg.        | n.d.        | N/A                  |
| 438Kot | European pied flycatcher  | AG | Faeces | neg.        | n.d.        | N/A                  |
| 439kot | Common swift              | LU | Faeces | neg.        | n.d.        | N/A                  |
| 440Kot | Barn swallow              | LU | Faeces | neg.        | n.d.        | N/A                  |
| 441C   | Blackbird                 | AG | Choana | neg.        | n.d.        | N/A                  |
| 441K   | Blackbird                 | AG | Cloaca | neg.        | n.d.        | N/A                  |
| 441Kot | Blackbird                 | AG | Faeces | neg.        | n.d.        | N/A                  |
| 442Kot | Common wood pigeon        | ZH | Faeces | pos. (37.9) | neg.        | Not identified       |
| 444C   | Song thrush               | LU | Choana | neg.        | n.d.        | N/A                  |
| 444K   | Song thrush               | LU | Cloaca | neg.        | n.d.        | N/A                  |
| 444Kot | Song thrush               | LU | Faeces | neg.        | n.d.        | N/A                  |
| 445C   | Feral pigeon              | LU | Choana | neg.        | n.d.        | N/A                  |
| 445K   | Feral pigeon              | LU | Cloaca | neg.        | n.d.        | N/A                  |

|        |                           |    |        |      |      |     |
|--------|---------------------------|----|--------|------|------|-----|
| 445Kot | Feral pigeon              | LU | Faeces | neg. | n.d. | N/A |
| 446C   | Eurasian collared dove    | AG | Choana | neg. | n.d. | N/A |
| 446K   | Eurasian collared dove    | AG | Cloaca | neg. | n.d. | N/A |
| 447C   | House sparrow             | AG | Choana | neg. | n.d. | N/A |
| 447K   | House sparrow             | AG | Cloaca | neg. | n.d. | N/A |
| 447Kot | House sparrow             | AG | Faeces | neg. | n.d. | N/A |
| 448Kot | House sparrow             | NW | Faeces | neg. | n.d. | N/A |
| 449Kot | Eurasian collared dove    | LU | Faeces | neg. | n.d. | N/A |
| 450Kot | Feral pigeon              | LU | Faeces | neg. | n.d. | N/A |
| 451C   | Black redstart            | LU | Choana | neg. | n.d. | N/A |
| 451K   | Black redstart            | LU | Cloaca | neg. | n.d. | N/A |
| 453Kot | Goldfinch                 | LU | Faeces | neg. | n.d. | N/A |
| 455Kot | House sparrow             | LU | Faeces | neg. | n.d. | N/A |
| 456C   | Barn swallow              | AG | Choana | neg. | n.d. | N/A |
| 456K   | Barn swallow              | AG | Cloaca | neg. | n.d. | N/A |
| 457C   | Yellow-legged gull        | LU | Choana | neg. | n.d. | N/A |
| 457K   | Yellow-legged gull        | LU | Cloaca | neg. | n.d. | N/A |
| 458C   | Common starling           | LU | Choana | neg. | n.d. | N/A |
| 458K   | Common starling           | LU | Cloaca | neg. | n.d. | N/A |
| 459Kot | Garden warbler            | LU | Faeces | neg. | n.d. | N/A |
| 461Kot | Fancy pigeon              | LU | Faeces | neg. | n.d. | N/A |
| 462Kot | European green woodpecker | LU | Faeces | neg. | n.d. | N/A |
| 463Kot | Blackbird                 | AG | Faeces | neg. | n.d. | N/A |
| 464Kot | Corn crane                | ZH | Faeces | neg. | n.d. | N/A |
| 465Kot | Barn swallow              | LU | Faeces | neg. | n.d. | N/A |
| 466C   | Yellowhammer              | LU | Choana | neg. | n.d. | N/A |
| 466K   | Yellowhammer              | LU | Cloaca | neg. | n.d. | N/A |
| 466Kot | Yellowhammer              | LU | Faeces | neg. | n.d. | N/A |
| 467C   | House sparrow             | LU | Choana | neg. | n.d. | N/A |
| 467K   | House sparrow             | LU | Cloaca | neg. | n.d. | N/A |
| 468Kot | Barn swallow              | NW | Faeces | neg. | n.d. | N/A |
| 469C   | Song thrush               | LU | Choana | neg. | n.d. | N/A |
| 469K   | Song thrush               | LU | Cloaca | neg. | n.d. | N/A |
| 469Kot | Song thrush               | LU | Faeces | neg. | n.d. | N/A |
| 470C   | European robin            | LU | Choana | neg. | n.d. | N/A |
| 470K   | European robin            | LU | Cloaca | neg. | n.d. | N/A |
| 471C   | Blackbird                 | AG | Choana | neg. | n.d. | N/A |
| 471K   | Blackbird                 | AG | Cloaca | neg. | n.d. | N/A |
| 475Kot | Feral pigeon              | LU | Faeces | neg. | n.d. | N/A |
